# Supplementary material for: Are ionic liquids pairwise in gas phase? A cluster approach and in situ IR study
Source: Royal Society of Chemistry journal article supplement (doi:10.1039/c3cp44493g), 2013-01-01
Supplement: c3cp44493g.pdf [file c3cp44493g.pdf]

Supporting Information

## Are Ionic Liquids Pairwise In Gas Phase?

### A cluster Approach and *In-situ* IR Study

Kun Dong<sup>a</sup>, Lidong Zhao<sup>a</sup>, Qian Wang<sup>a</sup>, Yuting Song<sup>a</sup> and Suojiang Zhang<sup>\*a</sup>

#### 1. TGA experiment and Enthalpies measurement of [Emim][Cl] and [EtAm][NO<sub>3</sub>]

The [Emim][Cl] and [EtAm][NO<sub>3</sub>] ILs were purchased from Beijing Zhongke AnyIn Technology Co. Ltd. Prior to use, all the ILs were dried in a vacuum at 55°C and more than 48h.

In this work, we used a Q5000IR (TA Instruments-Waters) TGA. Mass calibration was performed with help of a standard weight of 100 µg. The uncertainty of temperature calibration was less than 0.5 K. In the experiments, the IL sample was placed in a plane platinum crucible with vertical walls, diameter of 10 mm and height 3 mm and was stepwise heated inside of the measuring head of the TGA. A mass loss was recorded at each temperature step (seeing Fig. S1 and Fig. S2). Prior to the measurement, a conditioning of the sample inside the TGA have been performed. A heating ramp of 1 K·min<sup>-1</sup> was used, followed by a 4 h.

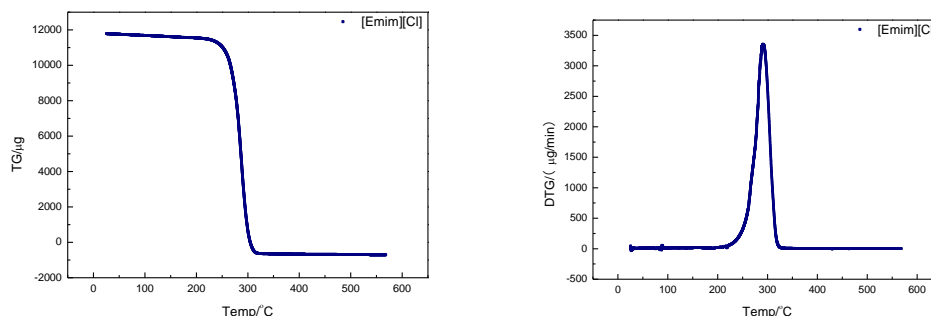

Fig. S1 TGA of [Emim][Cl] with initial about 11mg IL sample

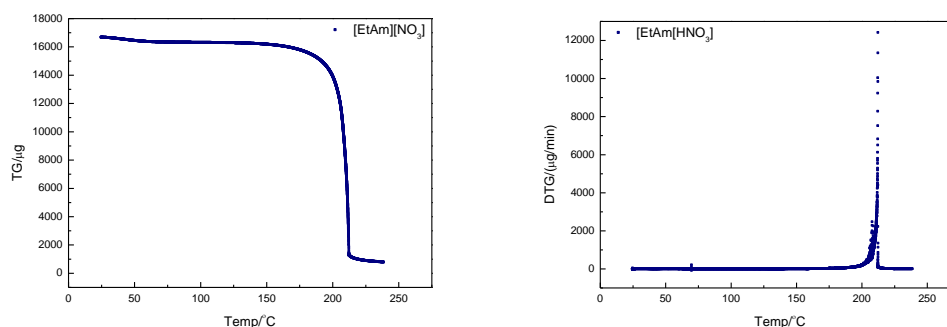

Fig. S2 TGA of [EtAm][NO<sub>3</sub>] with initial about 16mg IL sample

The optimal conditions for reliable TGA determinations of vaporization enthalpies of ILs was

referred to Verevkin et al. works.<sup>1</sup> The relationship between the mass loss  $r = dm/dt$  and the vaporization enthalpy was derived according to the Clausius-Clapeyron equation (1) but by using the mass loss rate  $dm/dt$  measured by the TGA (instead of the absolute pressure):<sup>2</sup>

$$\ln\left(\frac{dm}{dt}\sqrt{T}\right) = A' - \frac{\Delta_1^s H(T_0) - \Delta_1^s C T_0}{R} \left(\frac{1}{T} - \frac{1}{T_0}\right) + \frac{\Delta_1^s C}{R} \ln\left(\frac{T}{T_0}\right) \quad (1)$$

with a constant  $A'$  which is essentially unknown and which includes parameters specific for our setup but is independent from the substance studied.  $T_0$  appearing in Equ. (1) is an arbitrarily chosen reference temperature (which here has been chosen to be 298 K) and  $\Delta_1^s C$  is the difference of the molar heat capacities. Enthalpy of vaporization obtained at the proper average temperature  $T_{av}$  range in which the sample can not be decomposed. Then the enthalpy has been adjusted to the reference temperature  $T = 298.15$  K using the previously acknowledged for ILs value  $\Delta_1^s C = 100$  J·K<sup>-1</sup>·mol<sup>-1</sup> for the sake of comparison with our earlier work. For [Emim][Cl], the  $\Delta_1^s H(298.15) = 158.6$  kJ/mol with  $R^2 = 0.9994$  at  $T_{av} = 220 \sim 250$  °C temperature range. For [EtAm][NO<sub>3</sub>],  $\Delta_1^s H(298.15) = 148.7$  kJ/mol with  $R^2 = 0.9944$  at  $T_{av} = 180 \sim 195$  °C.

## 2. The cluster approach

Thermodynamic computation in Gaussian code is based on Statistical Mechanics. The partition function  $q$  of a single cluster can be expressed into equ. (2)

$$q = q_{trans} q_{rot} q_{vib} q_{elec} \quad (2)$$

$q_{trans}$  represents the translational partition function,  $q_{rot}$  represents rotational partition function,  $q_{vib}$  represent vibrational partition function and  $q_{elec}$  is electronic partition function. Vibrational energy levels are added within the harmonic approximation. Rotational energy levels are estimated treating each cluster as a classical rotator with its three moments of inertia. The translational energy levels stem from an approximate treatment of cluster translation as a particle in a three-dimensional box.

The entropy  $S$  and internal energy  $E$  of a cluster can be expressed:

$$S = R(\ln(q_{trans} q_{rot} q_{vib} q_{elec} e)) + T \left(\frac{\partial \ln q}{\partial T}\right)_V \quad (3)$$

$$E = Nk_B T^2 \left( \frac{\partial \ln q}{\partial T} \right) \quad (4)$$

It is assumed that each cluster partition function  $q$  can be factored in the usual way into translational, rotational, vibrational and electronic contributions.

In the translational partition function be expressed into equ. (5)

$$q_{trans} = \frac{V}{\Lambda^3} \quad (5), \quad \text{where } \Lambda = \frac{h}{(2\pi mkT)^{1/2}} \text{ is the thermal de Broglie wavelength. If being}$$

the an ideal gas, the volume can be estimated from  $pV = nRT$  and the translational partition function becomes:

$$q_{trans} = \left( \frac{2\pi mkT}{h^2} \right)^{3/2} \frac{KT}{P} \quad (6)$$

Then entropy

Rotational partition function be expressed into equ. (7)

$$q_{rot} = \frac{\sqrt{\pi}}{\sigma} \left( \frac{T^3}{\Theta_A \Theta_B \Theta_C} \right)^{1/2} \quad (7), \quad \text{where } \Theta_{A,B,C} = \frac{\hbar^2}{2I_{A,B,C} K} \text{ is rotational temperatures.}$$

Vibrational partition function be expressed into equ. (8)

$$q_{vib} = \prod_{i=1}^{3n-6} \frac{1}{1 - e^{-\theta_i/T}} \quad (8), \quad \text{where } \theta_i = \frac{h\nu_i}{k} \text{ is vibrational temperatures.}$$

Finally, electronic partition function be expressed into equ. (9)

$$q_{elec} = \omega_0 e^{-E_0/kT} \quad (9), \quad \text{where } \omega \text{ is the degeneracy of the energy level.}$$

Having the total partition function  $q$  of a cluster, entropy  $S$  and energy  $E$  can be calculated, then other thermodynamic properties such as  $H$ ,  $G$  can be calculated.

### 3. The predicted enthalpies of the four ILs

Tab. S1 Calculated  $\Delta_{\text{vap}}H$  (kJ/mol, 298.15K) of [Emim][NTf<sub>2</sub>] when the gas species were assumed to the II, PM and IP, respectively.

|   | IP1@[Emim][NTf <sub>2</sub> ] | IP2@[Emim][NTf <sub>2</sub> ] | PM@[Emim][NTf <sub>2</sub> ] | II@[Emim][NTf <sub>2</sub> ] |
|---|-------------------------------|-------------------------------|------------------------------|------------------------------|
| 2 | 30.82                         | 79.22                         | 304.92                       | 444.9                        |
| 4 | 116.67                        | 165.07                        | 390.77                       | 530.75                       |
| 6 | 131.20                        | 182.23                        | 405.30                       | 545.28                       |

|    |        |        |        |        |
|----|--------|--------|--------|--------|
| 8  | 130.05 | 178.45 | 404.15 | 544.13 |
| 10 | 97.62  | 134.34 | 360.03 | 500.02 |
| 12 | 128.39 | 128.26 | 338.45 | 466.84 |

Tab. S2 Calculated  $\Delta_{\text{vap}}H$  (kJ/mol, 298.15K) of [Emmim][NTf<sub>2</sub>] when the gas species were assumed to the II, PM and IP, respectively.

|    | IP1@[Emmim][NTf <sub>2</sub> ] | IP2@[Emmim][NTf <sub>2</sub> ] | IP3@[Emmim][NTf <sub>2</sub> ] | II@[Emmim][NTf <sub>2</sub> ] |
|----|--------------------------------|--------------------------------|--------------------------------|-------------------------------|
| 2  | 48.87                          | 56.88                          | 114.91                         | 463.39                        |
| 4  | 80.63                          | 88.64                          | 146.67                         | 495.15                        |
| 6  | 104.49                         | 112.51                         | 170.54                         | 521.65                        |
| 8  | 111.58                         | 119.59                         | 177.62                         | 526.10                        |
| 10 | 114.31                         | 122.33                         | 180.35                         | 536.71                        |
| 12 | 123.63                         | 131.64                         | 189.67                         | 538.15                        |

Tab. S3 Calculated  $\Delta_{\text{vap}}H$  (kJ/mol, 298.15K) of [Emim][Cl] when the gas species were assumed to the II, PM and IP, respectively.

|    | IP1@[Emim][Cl] | IP2@[Emim][Cl] | IP3@[Emim][Cl] | PM@[Emim][Cl] | II@[Emim][Cl] |
|----|----------------|----------------|----------------|---------------|---------------|
| 2  | 79.55          | 82.18          | 121.73         | 219.42        | 512.16        |
| 4  | 123.19         | 125.82         | 165.37         | 263.06        | 555.80        |
| 6  | 116.58         | 119.20         | 158.76         | 256.44        | 549.18        |
| 8  | 125.64         | 128.26         | 167.82         | 265.50        | 558.24        |
| 10 | 125.89         | 128.51         | 168.07         | 265.76        | 558.50        |
| 12 | 134.46         | 137.08         | 176.64         | 274.33        | 567.07        |

Tab. S4 Calculated  $\Delta_{\text{vap}}H$  (kJ/mol, 298.15K) of [EtAm][NO<sub>3</sub>] when the gas species were assumed to the II, PM and IP, respectively.

|    | IP1@[EtAm][NO <sub>3</sub> ] | IP2@[EtAm][NO <sub>3</sub> ] | PM@[EtAm][NO <sub>3</sub> ] | II@[EtAm][NO <sub>3</sub> ] |
|----|------------------------------|------------------------------|-----------------------------|-----------------------------|
| 2  | 81.33                        | 237.91                       | 254.10                      | 694.36                      |
| 4  | 116.91                       | 273.48                       | 289.68                      | 729.94                      |
| 6  | 129.07                       | 285.64                       | 301.84                      | 742.09                      |
| 8  | 148.9                        | 305.47                       | 321.67                      | 761.93                      |
| 10 | 149.19                       | 305.76                       | 321.95                      | 762.21                      |
| 12 | 206.98                       | 363.55                       | 378.78                      | 820.00                      |

#### 4. The predicted free energies and entropies of vaporization of the [Emim][NTf<sub>2</sub>] IL

Tab. S5 Calculated  $\Delta_{\text{vap}}G$  (kJ/mol, 298.15K) of [Emim][NTf<sub>2</sub>] when the gas species were assumed to the II, PM and IP, respectively.

|    | IP1@[Emim][NTf <sub>2</sub> ] | IP2@[Emim][NTf <sub>2</sub> ] | PM@[Emim][NTf <sub>2</sub> ] | II@[Emim][NTf <sub>2</sub> ] |
|----|-------------------------------|-------------------------------|------------------------------|------------------------------|
| 2  | 9.81                          | 52.07                         | 220.76                       | 362.76                       |
| 4  | 68.41                         | 110.90                        | 279.60                       | 421.58                       |
| 6  | 76.63                         | 119.12                        | 287.82                       | 429.81                       |
| 8  | 74.92                         | 117.41                        | 286.11                       | 428.10                       |
| 10 | 25.56                         | 68.05                         | 236.74                       | 378.73                       |
| 12 | 75.62                         | 118.10                        | 286.80                       | 428.79                       |

Tab. S6 Calculated  $\Delta_{\text{vap}}S$  (J/K·mol, 298.15K) of [Emim][NTf<sub>2</sub>] when the gas species were assumed to the II, PM and IP, respectively.

|    | IP1@[Emim][NTf <sub>2</sub> ] | IP2@[Emim][NTf <sub>2</sub> ] | PM@[Emim][NTf <sub>2</sub> ] | II@[Emim][NTf <sub>2</sub> ] |
|----|-------------------------------|-------------------------------|------------------------------|------------------------------|
| 2  | 71.25                         | 91.09                         | 282.26                       | 275.28                       |
| 4  | 161.87                        | 181.72                        | 372.81                       | 365.91                       |
| 6  | 183.04                        | 202.88                        | 394.06                       | 387.07                       |
| 8  | 184.90                        | 204.75                        | 395.92                       | 388.94                       |
| 10 | 202.51                        | 222.36                        | 413.53                       | 406.55                       |
| 12 | 207.17                        | 227.01                        | 418.19                       | 411.20                       |

### 5. The clusters of [Emim][NTf<sub>2</sub>] at size 2~12

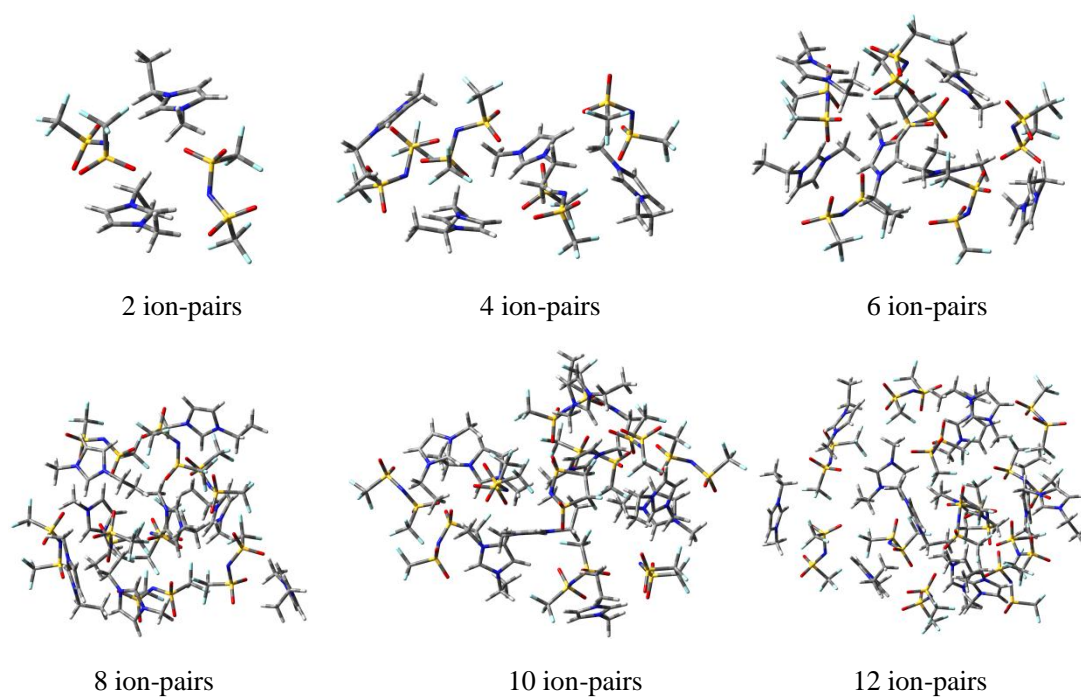

Fig. S3 The optimized geometries of [Emim][NTf<sub>2</sub>] at M062X/3-21G\* level.

1. V. N. Emel'yanenko, S. P. Verevkin and A. Heintz, *J. Am. Chem. Soc.*, 2007, 129, 3930-3937.
2. M. S. Kelkar and E. J. Maginn, *J. Phys. Chem. B*, 2007, 111, 9424-9427.
